# Supplementary material for: “One Health” or Three? Publication Silos Among the One Health Disciplines
Source: PubMed Central journal article supplement (PMC4839662; doi:10.1371/journal.pbio.1002448), 2016-04-21

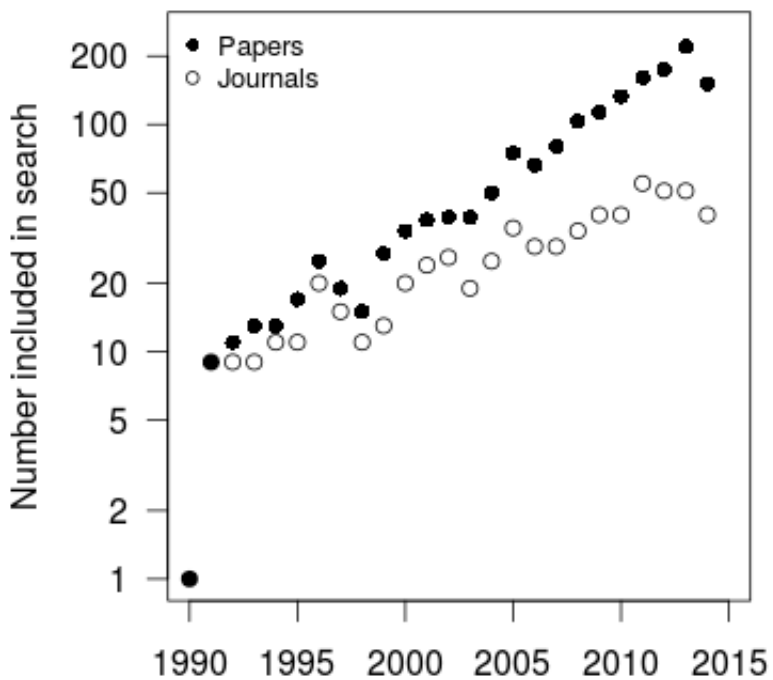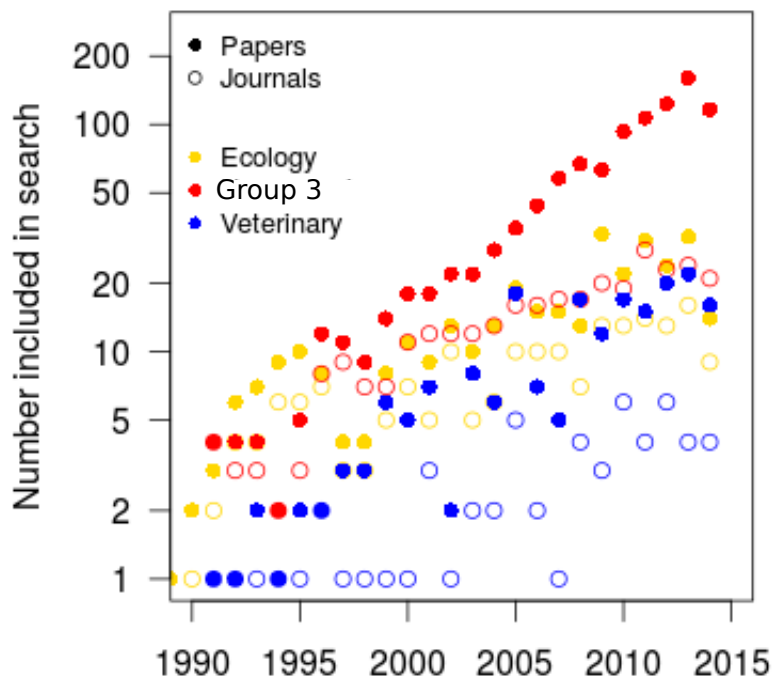

Supplement: pbio.1002448.s008.pdf [file pbio.1002448.s008.pdf]
